# Supplementary material for: SIK2 represses AKT/GSK3β/β‐catenin signaling and suppresses gastric cancer by inhibiting autophagic degradation of protein phosphatases
Source: PubMed Central journal article supplement (PMC7782074; doi:10.1002/1878-0261.12838), 2020-11-20
Supplement: MOL2-15-228-s001.pdf [file MOL2-15-228-s001.pdf]

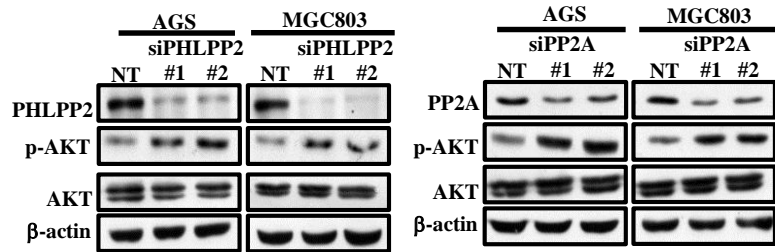

**Supplementary Fig. S1.** Western blot analysis of expression of p-AKT and total AKT in the AGS and MGC803 cells with either PHLPP2 or PP2A knockdown using two specific siRNAs.
